# Supplementary material
Source: Springer Nature journal article supplement (https://www.springermedizin.de/resource/supplementary/12872_2006_138_MOESM6_ESM.pdf/9431100)
Supplement: MOESM6 [file 9431100]

## GRMD

Increase in Q/R ratio in leads II, III and aVF

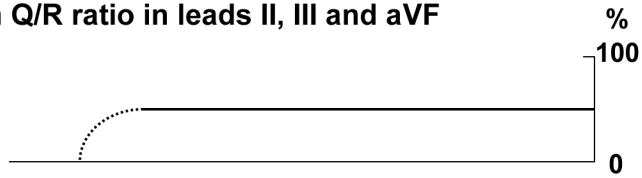

Hyperechoic lesion in posterior wall by echocardiography

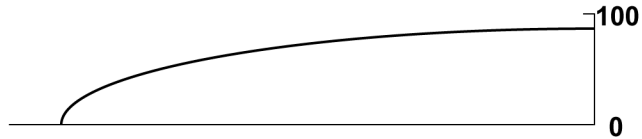

Fibrotic change in posterior wall by pathology

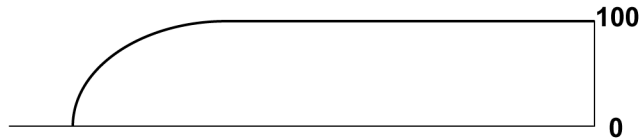

2 4 6 8 10 12 14 16 18 20 22 24 mo

## CXMD<sub>J</sub>

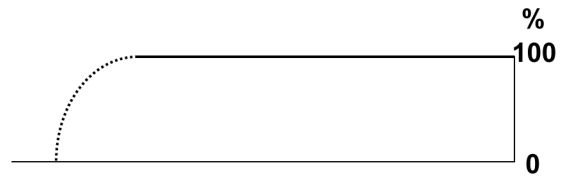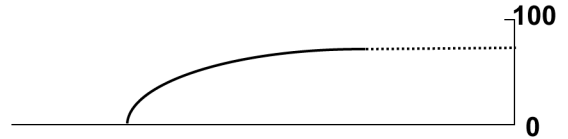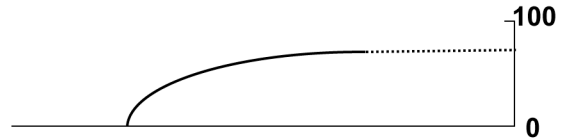

2 4 6 8 10 12 14 16 18 20 mo
